# Supplementary material for: Nonparametric time series summary statistics for high-frequency accelerometry data from individuals with advanced dementia
Source: PubMed Central journal article supplement (PMC7518630; doi:10.1371/journal.pone.0239368), 2020-09-25
Supplement: pone.0239368.s001.pdf [file pone.0239368.s001.pdf]

**S1 Table. Demographic variables.** Key demographic characteristics of the 32 resident participants from the study of [33]. The 26 participants with advanced dementia from which we have valid accelerometry data are all from this larger study, where the demographic breakdown between those participants with and without valid accelerometry data is not available.

| <b>Characteristic</b>                  | <b>Non-intervention</b> | <b>Intervention</b> |
|----------------------------------------|-------------------------|---------------------|
| <b>Sex, n (%)</b>                      |                         |                     |
| Male                                   | 9 (64.3)                | 8 (44.4)            |
| Female                                 | 5 (35.7)                | 10 (55.6)           |
| <b>Age (years), mean±SD</b>            | 84.7±6.4                | 79.0±10.5           |
| <b>Marital status, n (%)</b>           |                         |                     |
| Married                                | 11 (78.6)               | 7 (38.9)            |
| Single                                 | 0                       | 3 (16.7)            |
| Widowed                                | 3 (21.4)                | 8 (44.4)            |
| <b>Ethnicity, n (%)</b>                |                         |                     |
| Black African Caribbean                | 0                       | 1 (5.6)             |
| White                                  | 14 (100.0)              | 17 (94.4)           |
| <b>Dementia diagnosis, n (%)</b>       |                         |                     |
| Alzheimer's disease                    | 7 (50.0)                | 7 (38.9)            |
| Vascular dementia                      | 1 (7.1)                 | 5 (27.8)            |
| Dementia with Lewy bodies              | 2 (14.3)                | 0                   |
| Unspecified dementia                   | 4 (28.6)                | 6 (33.3)            |
| <b>Length of stay (years), mean±SD</b> | 2.9±2.6                 | 2.1±1.4             |
