# Supplementary material for: Nonparametric time series summary statistics for high-frequency accelerometry data from individuals with advanced dementia
Source: PubMed Central journal article supplement (PMC7518630; doi:10.1371/journal.pone.0239368), 2020-09-25
Supplement: pone.0239368.s002.pdf [file pone.0239368.s002.pdf]

**S2 Table. Summary statistics.** Mean, standard deviation (SD), minimum and maximum values of all statistical measures used in this paper for different groups of participants. The dementia group refers to the combined non-intervention and intervention groups.

| Statistical measures | Groups           | Mean  | SD    | Min.  | Max.  |
|----------------------|------------------|-------|-------|-------|-------|
| IS                   | Non-intervention | 0.029 | 0.019 | 0.003 | 0.063 |
|                      | Intervention     | 0.039 | 0.025 | 0.005 | 0.082 |
|                      | Dementia         | 0.035 | 0.023 | 0.003 | 0.082 |
|                      | Without Dementia | 0.147 | 0.054 | 0.062 | 0.257 |
| IV                   | Non-intervention | 1.605 | 0.137 | 1.424 | 1.856 |
|                      | Intervention     | 1.519 | 0.186 | 1.036 | 1.775 |
|                      | Dementia         | 1.555 | 0.169 | 1.036 | 1.856 |
|                      | Without Dementia | 1.028 | 0.301 | 0.376 | 1.487 |
| $\alpha$ (overall)   | Non-intervention | 0.816 | 0.057 | 0.722 | 0.946 |
|                      | Intervention     | 0.878 | 0.050 | 0.808 | 0.965 |
|                      | Dementia         | 0.852 | 0.061 | 0.722 | 0.965 |
|                      | Without Dementia | 1.005 | 0.098 | 0.843 | 1.174 |
| $\alpha$ (daytime)   | Non-intervention | 0.820 | 0.066 | 0.717 | 0.983 |
|                      | Intervention     | 0.875 | 0.053 | 0.792 | 0.962 |
|                      | Dementia         | 0.852 | 0.064 | 0.717 | 0.983 |
|                      | Without Dementia | 1.006 | 0.097 | 0.842 | 1.175 |
| $\alpha$ (nighttime) | Non-intervention | 0.806 | 0.067 | 0.710 | 0.891 |
|                      | Intervention     | 0.897 | 0.053 | 0.825 | 1.004 |
|                      | Dementia         | 0.859 | 0.074 | 0.710 | 1.004 |
|                      | Without Dementia | 0.905 | 0.083 | 0.741 | 1.043 |
| PoV <sup>(F)</sup>   | Non-intervention | 0.027 | 0.031 | 0.001 | 0.101 |
|                      | Intervention     | 0.049 | 0.046 | 0.002 | 0.138 |
|                      | Dementia         | 0.040 | 0.041 | 0.001 | 0.138 |
|                      | Without Dementia | 0.152 | 0.065 | 0.077 | 0.305 |
| PoV <sup>(H)</sup>   | Non-intervention | 0.055 | 0.036 | 0.007 | 0.122 |
|                      | Intervention     | 0.078 | 0.052 | 0.012 | 0.167 |
|                      | Dementia         | 0.068 | 0.047 | 0.007 | 0.167 |
|                      | Without Dementia | 0.224 | 0.071 | 0.108 | 0.338 |
